# Supplementary material for: Performance of Risk Scores in Predicting Infective Endocarditis in Patients with Staphylococcus aureus Bacteraemia in a Prospective Asian Cohort
Source: MDPI journal article supplement (doi:10.3390/jcm13102947), 2024-05-16
Supplement: s1 [file s1]

Supplemental Table S1: Components of each clinical prediction tool of infective endocarditis in patients with *Staphylococcus aureus* bacteraemia

| PREDICT Day 1 (cutoff $\geq 4$ )       |        | PREDICT Day 5 (cut off $\geq 2$ )      |        | VIRSTA (cutoff $\geq 3$ )                      |        |
|----------------------------------------|--------|----------------------------------------|--------|------------------------------------------------|--------|
| Item                                   | Points | Item                                   | Points | Item                                           | Points |
| Implantable cardioverter-defibrillator | 2      | Implantable cardioverter-defibrillator | 2      | Cerebral or peripheral emboli                  | 5      |
| Permanent pacemaker                    | 3      | Permanent pacemaker                    | 3      | Meningitis                                     | 5      |
| Community acquisition                  | 2      | Community acquisition                  | 2      | Permanent intracardiac device or previous IE   | 4      |
| Healthcare acquisition                 | 1      | Healthcare acquisition                 | 1      | Pre-existing native valve disease              | 3      |
|                                        |        | Positive blood culture after 72h       | 2      | IV drug use                                    | 4      |
|                                        |        |                                        |        | Positive culture after 48h                     | 3      |
|                                        |        |                                        |        | Community or healthcare-associated bacteraemia | 2      |
|                                        |        |                                        |        | Severe sepsis or septic shock                  | 1      |
|                                        |        |                                        |        | C-reactive protein $>190\text{mg/L}$           | 1      |
